# Supplementary material for: A Prospective Cohort Study providing Insights for Markers of Adverse Pregnancy Outcome in Women of Advanced Maternal Age
Source: Research Square preprint supplement (doi:10.21203/rs.3.rs-130070/v1), 2020-12-30
Supplement: Supplementary file 3 [file 39728ad28740121edecee422.docx]

# **A Prospective Cohort Study providing Insights for Markers of Adverse Pregnancy Outcome in Women of Advanced Maternal Age**

Samantha C. LEAN, Maternal and Fetal Health Research Centre, Division of Developmental Biology and Medicine, Faculty of Biology, Medicine and Health, University of Manchester, UK. sl961@cam.ac.uk

Rebecca L. JONES, Maternal and Fetal Health Research Centre, Division of Developmental Biology and Medicine, Faculty of Biology, Medicine and Health, University of Manchester, UK. rebecca.lee.jones@manchester.ac.uk

Stephen A. ROBERTS, Centre for Biostatistics, Faculty of Biology, Medicine and Health, University of Manchester, UK. steve.roberts@manchester.ac.uk

Alexander E.P. HEAZELL, Maternal and Fetal Health Research Centre, Division of Developmental Biology and Medicine, Faculty of Biology, Medicine and Health, University of Manchester, UK

**Supplementary Table 5: Obstetric outcomes of participants in nested case cohort study 2 (NCC2)**

| **Demographics** | **NPO**  **(n=43)** | **APO**  **(n=43)** | ***p* value** |
| --- | --- | --- | --- |
| **Gestation at Delivery a**  (weeks + days) | **39+5** (37+6 – 42+3) | **38+3** (29+6 - 41+3) | **0.007** |
| **Birthweight** (g) **a** | **3439** (2960-4000) | **2537** (1300-3690) | **<0.0001** |
| **IBC a** | **45.1** (13.0-92.2) | **10.8** (0.0-91.4) | **<0.0001** |
| **Male Infant b** | **49%** (21) | **51%** (22) | 0.83 |
| **Induction b** | **7%** (3) | **35%** (15) | **0.0016** |
| **Mode of Delivery b**  *NVD*  *ELCS*  *EMCS*  *INST.* | **65%** (28)  **16%** (7)  **7%** (3)  **12%** (5) | **40%** (17)  **21%** (9)  **23%** (10)  **21%** (9) | **0.020**  0.78  **0.041**  0.38 |
| **Pre-Term b** | **0%** (0) | **26%** (11) | **0.00027** |
| **SGA b**  **FGR b** | **0%** (0)  **0%** (0) | **84%** (36)  **44%** (19) | **---** |
| **Stillborn b** | **0%** (0) | **7%** (3) | --- |
| **Apgar <7 @ 5mins b** | **0%** (0) | **9%** (4) | --- |
| **NICU b** | **0%** (0) | **26%** (11) | --- |

*NCC2 (AMA normal pregnancy outcome (NPO) vs adverse pregnancy outcome (APO)); n=43/group. Data are as mean (range) or percentage (number). IBC = individualised birthweight centile, NVD = normal vaginal delivery, ELCS = elective caesarean section, EMCS= emergency caesarean section, INST. = instrumental delivery. aMann-Whitney U Test or bFisher’s Exact test.* Significant differences are highlighted with **bold** p values.
