# Supplementary material for: A Prospective Cohort Study providing Insights for Markers of Adverse Pregnancy Outcome in Women of Advanced Maternal Age
Source: Research Square preprint supplement (doi:10.21203/rs.3.rs-130070/v1), 2020-12-30
Supplement: Supplementary file 8 [file 883fba9fd583d93e623cab9f.docx]

# **A Prospective Cohort Study providing Insights for Markers of Adverse Pregnancy Outcome in Women of Advanced Maternal Age**

Samantha C. LEAN, Maternal and Fetal Health Research Centre, Division of Developmental Biology and Medicine, Faculty of Biology, Medicine and Health, University of Manchester, UK. sl961@cam.ac.uk

Rebecca L. JONES, Maternal and Fetal Health Research Centre, Division of Developmental Biology and Medicine, Faculty of Biology, Medicine and Health, University of Manchester, UK. rebecca.lee.jones@manchester.ac.uk

Stephen A. ROBERTS, Centre for Biostatistics, Faculty of Biology, Medicine and Health, University of Manchester, UK. steve.roberts@manchester.ac.uk

Alexander E.P. HEAZELL, Maternal and Fetal Health Research Centre, Division of Developmental Biology and Medicine, Faculty of Biology, Medicine and Health, University of Manchester, UK

Supplementary Table 4: Demographic data of participants in nested case cohort study 2 (NCC2)

| **Demographic** | **NPO**  **(n=43)** | **APO**  **(n=43)** | ***p* value** |
| --- | --- | --- | --- |
| **Maternal Age a**  (years) | **39** (35-47) | **39** (35-46) | 0.902 |
| **Paternal Age a**  (years) | **39** (27-56) | **40** (25-60) | 0.99 |
| **Ethnicity b**  *European*  *Other* | **88%** (38)  **12%** (5) | **91%** (39)  **9%** (4) | 0.74 |
| **BMI** (kg/m2) **a** | **29.0** (18.5-24.3) | **25.0** (20-29.1) | 0.52 |
| **Marital Status b**  *Married*  *Partner*  *Single* | **61%** (26)  **37%** (16)  **2%** (1) | **40%** (17)  **58%** (25)  **2%** (1) | 0.057 |
| **Employment b**  *Employed* | **74%** (32) | **84%** (36) | 0.43 |
| **Smoking Status b**  *Smoker*  *Ex-smoker*  *Non-smoker* | **12%** (5)  **16%** (7)  **72%** (31) | **19%** (8)  **30%** (13)  **51%** (22) | 0.051 |
| **Housing Status b**  *Owns* | **77%** (33) | **67%** (29) | 0.35 |
| **IMD**  *Score* | **20.13**  (3.32-66.1) | **13.5**  (2.16-53.4) | 0.11 |
| **Parity b**  *Primips*  *Parous*  *Grandmultiparous* | **28%** (12)  **72%** (31)  **7%** (3) | **44%** (19)  **56%** (23)  **2%** (1) | 0.081  0.20  0.37 |
| **Previous Miscarriage b** | **42%** (18) | **44%** (19) | >0.99 |
| **Previous APO b**  *(of parous women)* | **29%** (9) | **46%** (11) | 0.25 |
| **Previous Fertility Treatment b** | **7%** (3) | **2%** (1) | 0.37 |
| **Current Fertility Treatment b** | **7%** (3) | **7%** (3) | 1.0 |

*NCC2 (**AMA normal pregnancy outcome (NPO) vs adverse pregnancy outcome (APO)); n=43/group. Data are mean (range) or percentage (number). BMI = body mass index, APO = adverse pregnancy outcome. aMann-Whitney U Test or bFisher’s exact test.* Significant differences are highlighted with **bold** p values.
